# Supplementary material
Source: PubMed Central journal article supplement (PMC7733829)
Supplement: pnas.2017733117.sd01.pdf [file pnas.2017733117.sd01.pdf]

**Dataset S1.** List of terms and their abbreviations for gray matter regions of the adult rat forebrain. Two alphabetically arranged lists are provided: 1) by abbreviation, 2) by term.

These terms and abbreviations are also searchable at <https://sites.google.com/view/the-neurome-project/brain-maps>

### 1. Abbreviations for adult rat forebrain gray matter regions and their corresponding terms

|       |                                                      |
|-------|------------------------------------------------------|
| 6b    | Isocortical layer 6b                                 |
| AAA   | Anterior amygdalar area                              |
| ACAd  | Anterior cingulate area dorsal part                  |
| ACAv  | Anterior cingulate area ventral part                 |
| ACB   | Accumbens nucleus                                    |
| AD    | Anterodorsal thalamic nucleus                        |
| ADP   | Anterodorsal preoptic nucleus                        |
| AHA   | Anterior hypothalamic area                           |
| AHNa  | Anterior hypothalamic nucleus anterior part          |
| AHNc  | Anterior hypothalamic nucleus central part           |
| AHNd  | Anterior hypothalamic nucleus dorsal part            |
| AHNp  | Anterior hypothalamic nucleus posterior part         |
| AId   | Dorsal agranular insular area                        |
| AIp   | Posterior agranular insular area                     |
| AIV   | Ventral agranular insular area                       |
| AMd   | Anteromedial thalamic nucleus dorsal part            |
| AMv   | Anteromedial thalamic nucleus ventral part           |
| AOA   | Anterior olfactory area                              |
| AOB   | Accessory olfactory bulb                             |
| ARH   | Arcuate hypothalamic nucleus                         |
| AUDd  | Dorsal auditory areas                                |
| AUDp  | Primary auditory area                                |
| AUDpo | Posterior auditory area                              |
| AUDv  | Ventral auditory areas                               |
| AV    | Anteroventral thalamic nucleus                       |
| AVP   | Anteroventral preoptic nucleus                       |
| AVPV  | Anteroventral periventricular nucleus                |
| BA    | Bed nucleus of accessory olfactory tract             |
| BAC   | Bed nucleus of anterior commissure                   |
| BLAa  | Basolateral amygdalar nucleus anterior part          |
| BLAp  | Basolateral amygdalar nucleus posterior part         |
| BMAa  | Basomedial amygdalar nucleus anterior part           |
| BMAp  | Basomedial amygdalar nucleus posterior part          |
| BSTal | Bed nuclei of terminal stria anterolateral area      |
| BSTam | Bed nuclei of terminal stria anteromedial area       |
| BSTd  | Bed nuclei of terminal stria dorsal nucleus          |
| BSTdm | Bed nuclei of terminal stria dorsomedial nucleus     |
| BSTfu | Bed nuclei of terminal stria fusiform nucleus        |
| BSTif | Bed nuclei of terminal stria interfascicular nucleus |
| BSTju | Bed nuclei of terminal stria juxtacapsular nucleus   |
| BSTmg | Bed nuclei of terminal stria magnocellular nucleus   |
| BSTov | Bed nuclei of terminal stria oval nucleus            |
| BSTpr | Bed nuclei of terminal stria principal nucleus       |
| BSTrh | Bed nuclei of terminal stria rhomboid nucleus        |
| BSTse | Bed nuclei of terminal stria strial extension        |
| BSTtr | Bed nuclei of terminal stria transverse nucleus      |

|        |                                                                 |
|--------|-----------------------------------------------------------------|
| BSTv   | Bed nuclei of terminal stria ventral nucleus                    |
| CA1d   | Field CA1 dorsal part                                           |
| CA1v   | Field CA1 ventral part                                          |
| CA2    | Field CA2                                                       |
| CA3    | Field CA3                                                       |
| CEAc   | Central amygdalar nucleus capsular part                         |
| CEAl   | Central amygdalar nucleus lateral part                          |
| CEAm   | Central amygdalar nucleus medial part                           |
| CL     | Central lateral thalamic nucleus                                |
| CLA    | Clastrum                                                        |
| CM     | Central medial thalamic nucleus                                 |
| COAa   | Cortical amygdala area anterior part                            |
| COApl  | Cortical amygdala area posterior part lateral zone              |
| COApm  | Cortical amygdala area posterior part medial zone               |
| CP     | Caudoputamen                                                    |
| DG     | Dentate gyrus                                                   |
| DMHa   | Dorsomedial hypothalamic nucleus anterior part                  |
| DMHp   | Dorsomedial hypothalamic nucleus posterior part                 |
| DMHv   | Dorsomedial hypothalamic nucleus ventral part                   |
| ECT    | Ectorhinal area                                                 |
| ENTl   | Entorhinal area lateral part                                    |
| ENTm   | Entorhinal area medial part                                     |
| EPd    | Endopiriform nucleus dorsal part                                |
| EPv    | Endopiriform nucleus ventral part                               |
| FC     | Fasciola cinerea                                                |
| FF     | Fields of Forel                                                 |
| FS     | Striatal fundus                                                 |
| GPI    | Lateral globus pallidus                                         |
| GPm    | Medial globus pallidus                                          |
| GU     | Gustatory area                                                  |
| I      | Internuclear hypothalamic area                                  |
| IA     | Intercalated amygdalar nuclei                                   |
| IAD    | Interanterodorsal thalamic nucleus                              |
| IAM    | Interanteromedial thalamic nucleus                              |
| IG     | Indusium griseum                                                |
| IGL    | Intergeniculate leaflet                                         |
| ILA    | Infralimbic area                                                |
| IMD    | Intermediodorsal thalamic nucleus                               |
| LA     | Lateral amygdalar nucleus                                       |
| LD     | Lateral dorsal thalamic nucleus                                 |
| LGd    | Dorsal lateral geniculate nucleus                               |
| LGv    | Ventral lateral geniculate nucleus                              |
| LH     | Lateral habenula                                                |
| LHAa   | Lateral hypothalamic area anterior region                       |
| LHAd   | Lateral hypothalamic area dorsal region                         |
| LHAjd  | Lateral hypothalamic area juxtadorsomedial region               |
| LHAjp  | Lateral hypothalamic area juxtaparaventricular region           |
| LHAjvd | Lateral hypothalamic area juxtaventromedial region dorsal zone  |
| LHAjvv | Lateral hypothalamic area juxtaventromedial region ventral zone |
| LHAp   | Lateral hypothalamic area posterior region                      |
| LHAs   | Lateral hypothalamic area supraformical region                  |
| LHAsfa | Lateral hypothalamic area subformical region anterior zone      |
| LHAsfp | Lateral hypothalamic area subformical region posterior zone     |

|         |                                                                |
|---------|----------------------------------------------------------------|
| LHAv    | Lateral hypothalamic area ventral region                       |
| LM      | Lateral mammillary nucleus                                     |
| LP      | Lateral posterior thalamic nucleus                             |
| LPO     | Lateral preoptic area                                          |
| LSc.d   | Lateral septal nucleus caudal part dorsal zone                 |
| LSc.v   | Lateral septal nucleus caudal part ventral zone                |
| LSr.dl  | Lateral septal nucleus rostral part dorsolateral zone          |
| LSr.m.d | Lateral septal nucleus rostral part medial zone dorsal region  |
| LSr.m.v | Lateral septal nucleus rostral part medial zone ventral region |
| LSr.vl  | Lateral septal nucleus rostral part ventrolateral zone         |
| LSv     | Lateral septal nucleus ventral part                            |
| MA      | Magnocellular nucleus                                          |
| MDc     | Mediodorsal thalamic nucleus central part                      |
| MDl     | Mediodorsal thalamic nucleus lateral part                      |
| MDm     | Mediodorsal thalamic nucleus medial part                       |
| MEAad   | Medial amygdalar nucleus anterodorsal part                     |
| MEAv    | Medial amygdalar nucleus anteroventral part                    |
| MEApd   | Medial amygdalar nucleus posterodorsal part                    |
| MEApv   | Medial amygdalar nucleus posteroventral part                   |
| MEPO    | Median preoptic nucleus                                        |
| MGd     | Medial geniculate complex dorsal part                          |
| MGm     | Medial geniculate complex medial part                          |
| MGv     | Medial geniculate complex ventral part                         |
| MH      | Medial habenula                                                |
| MM      | Medial mammillary nucleus                                      |
| MOB     | Main olfactory bulb                                            |
| MOp     | Primary somatomotor area                                       |
| MOs     | Secondary somatomotor areas                                    |
| MPNc    | Medial preoptic nucleus central part                           |
| MPNl    | Medial preoptic nucleus lateral part                           |
| MPNm    | Medial preoptic nucleus medial part                            |
| MPO     | Medial preoptic area                                           |
| MS      | Medial septal nucleus                                          |
| NDB     | Diagonal band nucleus                                          |
| NLOT    | Nucleus of lateral olfactory tract                             |
| NLOT3   | Nucleus of lateral olfactory tract dorsal cap                  |
| ORBl    | Lateral orbital area                                           |
| ORBm    | Medial orbital area                                            |
| ORBv    | Ventral orbital area                                           |
| ORBvl   | Ventrolateral orbital area                                     |
| OT      | Olfactory tubercle                                             |
| OV      | Vascular organ of lamina terminalis                            |
| PA      | Posterior amygdalar nucleus                                    |
| PAA     | Piriform-amygdalar area                                        |
| PAR     | Parasubiculum                                                  |
| PCN     | Paracentral thalamic nucleus                                   |
| PD      | Posterodorsal preoptic nucleus                                 |
| PERI    | Perirhinal area                                                |
| PF      | Parafascicular nucleus                                         |
| PH      | Posterior hypothalamic nucleus                                 |
| PIR     | Piriform area                                                  |
| PL      | Prelimbic area                                                 |
| PMd     | Dorsal premammillary nucleus                                   |

|          |                                                                                                   |
|----------|---------------------------------------------------------------------------------------------------|
| PMv      | Ventral premammillary nucleus                                                                     |
| PO       | Posterior thalamic complex                                                                        |
| POL      | Posterior limiting thalamic nucleus                                                               |
| POST     | Postsubiculum                                                                                     |
| PP       | Peripeduncular nucleus                                                                            |
| PR       | Perireuniens nucleus                                                                              |
| PRE      | Presubiculum                                                                                      |
| PS       | Parastrial nucleus                                                                                |
| PSCH     | Suprachiasmatic preoptic nucleus                                                                  |
| PST      | Preparasubthalamic nucleus                                                                        |
| PSTN     | Parasubthalamic nucleus                                                                           |
| PT       | Paratenial nucleus                                                                                |
| PTLp     | Posterior parietal association areas                                                              |
| PVa      | Periventricular hypothalamic nucleus anterior part                                                |
| PVHam    | Paraventricular hypothalamic nucleus magnocellular division anterior magnocellular part           |
| PVHap    | Paraventricular hypothalamic nucleus parvicellular division anterior parvicellular part           |
| PVHd     | Paraventricular hypothalamic nucleus descending division                                          |
| PVHmpd   | Paraventricular hypothalamic nucleus parvicellular division medial parvicellular part dorsal zone |
| PVHpm    | Paraventricular hypothalamic nucleus magnocellular division posterior magnocellular part          |
| PVHpv    | Paraventricular hypothalamic nucleus parvicellular division periventricular part                  |
| PVp      | Periventricular hypothalamic nucleus posterior part                                               |
| PVT      | Paraventricular thalamic nucleus                                                                  |
| R        | Retina                                                                                            |
| RCH      | Retrochiasmatic area                                                                              |
| REc      | Nucleus reuniens caudal division                                                                  |
| REr      | Nucleus reuniens rostral division                                                                 |
| RH       | Rhomboid nucleus                                                                                  |
| RSPagl   | Retrosplenial region lateral agranular part                                                       |
| RSPd     | Retrosplenial region dorsal part                                                                  |
| RSPv     | Retrosplenial region ventral part anterior zone                                                   |
| RSPv.a   | Retrosplenial region ventral part zone a                                                          |
| RSPv.b/c | Retrosplenial region ventral part zone b/c                                                        |
| RT       | Reticular thalamic nucleus                                                                        |
| SBPV     | Subparaventricular zone                                                                           |
| SCH      | Suprachiasmatic nucleus                                                                           |
| SF       | Septofimbrial nucleus                                                                             |
| SFO      | Subfornical organ                                                                                 |
| SGN      | Suprageniculate nucleus                                                                           |
| SH       | Septohippocampal nucleus                                                                          |
| SI       | Innominate substance                                                                              |
| SMT      | Submedial thalamic nucleus                                                                        |
| SO       | Supraoptic nucleus                                                                                |
| SPFm     | Subparafascicular nucleus magnocellular part                                                      |
| SPFp     | Subparafascicular nucleus parvicellular part                                                      |
| SSp      | Primary somatosensory area                                                                        |
| SSs      | Supplemental somatosensory area                                                                   |
| STN      | Subthalamic nucleus                                                                               |
| SUBd     | Subiculum dorsal part                                                                             |
| SUBv     | Subiculum ventral part                                                                            |
| SUMl     | Supramammillary nucleus lateral part                                                              |
| SUMm     | Supramammillary nucleus medial part                                                               |
| TEa      | Temporal association areas                                                                        |
| TM       | Tuberomammillary nucleus                                                                          |

|        |                                                                     |
|--------|---------------------------------------------------------------------|
| TR     | Postpiriform transition area                                        |
| TRS    | Triangular septal nucleus                                           |
| TTd    | Tenia tecta dorsal part                                             |
| TTv    | Tenia tecta ventral part                                            |
| TU     | Lateral hypothalamic area middle group lateral tier tuberal nucleus |
| VAL    | Ventral anterior-lateral thalamic complex                           |
| VISal  | Anterolateral visual area                                           |
| VISam  | Anteromedial visual area                                            |
| VISC   | Visceral area                                                       |
| VISli  | Intermediolateral visual area                                       |
| VISll  | Laterolateral visual area                                           |
| VISlla | Anterior laterolateral visual area                                  |
| VISlm  | Mediolateral visual area                                            |
| VISp   | Primary visual area                                                 |
| VISpl  | Posterolateral visual area                                          |
| VISpm  | Posteromedial visual area                                           |
| VISrl  | Rostrolateral visual area                                           |
| VLP    | Ventrolateral preoptic nucleus                                      |
| VM     | Ventral medial thalamic nucleus                                     |
| VMHa   | Ventromedial hypothalamic nucleus anterior part                     |
| VMHc   | Ventromedial hypothalamic nucleus central part                      |
| VMHdm  | Ventromedial hypothalamic nucleus dorsomedial part                  |
| VMHvl  | Ventromedial hypothalamic nucleus ventrolateral part                |
| VPLpc  | Ventral posterolateral thalamic nucleus parvicellular part          |
| VPLpr  | Ventral posterolateral thalamic nucleus principal part              |
| VPMpc  | Ventral posteromedial thalamic nucleus parvicellular part           |
| VPMpr  | Ventral posteromedial thalamic nucleus principal part               |
| ZI     | Zona incerta                                                        |

## 2. Terms for adult rat forebrain gray matter regions and their corresponding abbreviations

Accessory olfactory bulb (AOB)  
 Accumbens nucleus (ACB)  
 Anterior amygdalar area (AAA)  
 Anterior cingulate area dorsal part (ACAd)  
 Anterior cingulate area ventral part (ACAv)  
 Anterior hypothalamic area (AHA)  
 Anterior hypothalamic nucleus anterior part (AHNa)  
 Anterior hypothalamic nucleus central part (AHNc)  
 Anterior hypothalamic nucleus dorsal part (AHNd)  
 Anterior hypothalamic nucleus posterior part (AHNp)  
 Anterior laterolateral visual area (VISlla)  
 Anterior olfactory area (AOA)  
 Anterodorsal preoptic nucleus (ADP)  
 Anterodorsal thalamic nucleus (AD)  
 Anterolateral visual area (VISal)  
 Anteromedial thalamic nucleus dorsal part (AMd)  
 Anteromedial thalamic nucleus ventral part (AMv)  
 Anteromedial visual area (VISam)  
 Anteroventral periventricular nucleus (AVPV)  
 Anteroventral preoptic nucleus (AVP)  
 Anteroventral thalamic nucleus (AV)  
 Arcuate hypothalamic nucleus (ARH)

Basolateral amygdalar nucleus anterior part (BLAa)  
Basolateral amygdalar nucleus posterior part (BLAp)  
Basomedial amygdalar nucleus anterior part (BMAa)  
Basomedial amygdalar nucleus posterior part (BMAp)  
Bed nuclei of terminal stria anterolateral area (BSTal)  
Bed nuclei of terminal stria anteromedial area (BSTam)  
Bed nuclei of terminal stria dorsal nucleus (BSTd)  
Bed nuclei of terminal stria dorsomedial nucleus (BSTdm)  
Bed nuclei of terminal stria fusiform nucleus (BSTfu)  
Bed nuclei of terminal stria interfascicular nucleus (BSTif)  
Bed nuclei of terminal stria juxtacapsular nucleus (BSTju)  
Bed nuclei of terminal stria magnocellular nucleus (BSTmg)  
Bed nuclei of terminal stria oval nucleus (BSTov)  
Bed nuclei of terminal stria principal nucleus (BSTpr)  
Bed nuclei of terminal stria rhomboid nucleus (BSTrh)  
Bed nuclei of terminal stria strial extension (BSTse)  
Bed nuclei of terminal stria transverse nucleus (BSTtr)  
Bed nuclei of terminal stria ventral nucleus (BSTv)  
Bed nucleus of accessory olfactory tract (BA)  
Bed nucleus of anterior commissure (BAC)  
Caudoputamen (CP)  
Central amygdalar nucleus capsular part (CEAc)  
Central amygdalar nucleus lateral part (CEAl)  
Central amygdalar nucleus medial part (CEAm)  
Central lateral thalamic nucleus (CL)  
Central medial thalamic nucleus (CM)  
Claustrum (CLA)  
Cortical amygdala area anterior part (COAa)  
Cortical amygdala area posterior part lateral zone (COApl)  
Cortical amygdala area posterior part medial zone (COApm)  
Dentate gyrus (DG)  
Diagonal band nucleus (NDB)  
Dorsal agranular insular area (AId)  
Dorsal auditory areas (AUDd)  
Dorsal lateral geniculate nucleus (LGd)  
Dorsal premammillary nucleus (PMd)  
Dorsomedial hypothalamic nucleus anterior part (DMHa)  
Dorsomedial hypothalamic nucleus posterior part (DMHp)  
Dorsomedial hypothalamic nucleus ventral part (DMHv)  
Ectorhinal area (ECT)  
Endopiriform nucleus dorsal part (EPd)  
Endopiriform nucleus ventral part (EPv)  
Entorhinal area lateral part (ENTl)  
Entorhinal area medial part (ENTm)  
Fasciola cinerea (FC)  
Field CA1 dorsal part (CA1d)  
Field CA1 ventral part (CA1v)  
Field CA2 (CA2)  
Field CA3 (CA3)  
Fields of Forel (FF)  
Gustatory area (GU)  
Indusium griseum (IG)  
Infralimbic area (ILA)

Innominate substance (SI)  
Interanterodorsal thalamic nucleus (IAD)  
Interanteromedial thalamic nucleus (IAM)  
Intercalated amygdalar nuclei (IA)  
Intergeniculate leaflet (IGL)  
Intermediodorsal thalamic nucleus (IMD)  
Intermediolateral visual area (VISli)  
Internuclear hypothalamic area (I)  
Isocortical layer 6b (6b)  
Lateral amygdalar nucleus (LA)  
Lateral dorsal thalamic nucleus (LD)  
Lateral globus pallidus (GPl)  
Lateral habenula (LH)  
Lateral hypothalamic area anterior region (LHAa)  
Lateral hypothalamic area dorsal region (LHAD)  
Lateral hypothalamic area juxtadorsomedial region (LHAjd)  
Lateral hypothalamic area juxtaparaventricular region (LHAjp)  
Lateral hypothalamic area juxtaventromedial region dorsal zone (LHAjvd)  
Lateral hypothalamic area juxtaventromedial region ventral zone (LHAjvv)  
Lateral hypothalamic area middle group lateral tier tuberal nucleus (TU)  
Lateral hypothalamic area posterior region (LHAp)  
Lateral hypothalamic area subfornical region anterior zone (LHASfa)  
Lateral hypothalamic area subfornical region posterior zone (LHASfp)  
Lateral hypothalamic area suprafornical region (LHAS)  
Lateral hypothalamic area ventral region (LHAV)  
Lateral mammillary nucleus (LM)  
Lateral orbital area (ORBl)  
Lateral posterior thalamic nucleus (LP)  
Lateral preoptic area (LPO)  
Lateral septal nucleus caudal part dorsal zone (LSc.d)  
Lateral septal nucleus caudal part ventral zone (LSc.v)  
Lateral septal nucleus rostral part dorsolateral zone (LSr.dl)  
Lateral septal nucleus rostral part medial zone dorsal region (LSr.m.d)  
Lateral septal nucleus rostral part medial zone ventral region (LSr.m.v)  
Lateral septal nucleus rostral part ventrolateral zone (LSr.vl)  
Lateral septal nucleus ventral part (LSv)  
Laterolateral visual area (VISll)  
Magnocellular nucleus (MA)  
Main olfactory bulb (MOB)  
Medial amygdalar nucleus anterodorsal part (MEAad)  
Medial amygdalar nucleus anteroventral part (MEAav)  
Medial amygdalar nucleus posterodorsal part (MEApd)  
Medial amygdalar nucleus posteroventral part (MEApv)  
Medial geniculate complex dorsal part (MGd)  
Medial geniculate complex medial part (MGm)  
Medial geniculate complex ventral part (MGv)  
Medial globus pallidus (GPm)  
Medial habenula (MH)  
Medial mammillary nucleus (MM)  
Medial orbital area (ORBm)  
Medial preoptic area (MPO)  
Medial preoptic nucleus central part (MPNc)  
Medial preoptic nucleus lateral part (MPNl)

Medial preoptic nucleus medial part (MPNm)  
Medial septal nucleus (MS)  
Median preoptic nucleus (MEPO)  
Mediodorsal thalamic nucleus central part (MDc)  
Mediodorsal thalamic nucleus lateral part (MDl)  
Mediodorsal thalamic nucleus medial part (MDm)  
Mediolateral visual area (VISlm)  
Nucleus of lateral olfactory tract (NLOT)  
Nucleus of lateral olfactory tract dorsal cap (NLOT3)  
Nucleus reuniens caudal division (REc)  
Nucleus reuniens rostral division (REr)  
Olfactory tubercle (OT)  
Paracentral thalamic nucleus (PCN)  
Parafascicular nucleus (PF)  
Parastrial nucleus (PS)  
Parasubiculum (PAR)  
Parasubthalamic nucleus (PSTN)  
Paratenial nucleus (PT)  
Paraventricular hypothalamic nucleus descending division (PVHd)  
Paraventricular hypothalamic nucleus magnocellular division anterior magnocellular part (PVHam)  
Paraventricular hypothalamic nucleus magnocellular division posterior magnocellular part (PVHpm)  
Paraventricular hypothalamic nucleus parvicellular division anterior parvicellular part (PVHap)  
Paraventricular hypothalamic nucleus parvicellular division medial parvicellular part dorsal zone (PVHmpd)  
Paraventricular hypothalamic nucleus parvicellular division periventricular part (PVHpv)  
Paraventricular thalamic nucleus (PVT)  
Peripeduncular nucleus (PP)  
Perireuniens nucleus (PR)  
Perirhinal area (PERI)  
Periventricular hypothalamic nucleus anterior part (PVa)  
Periventricular hypothalamic nucleus posterior part (PVp)  
Piriform area (PIR)  
Piriform-amygdalar area (PAA)  
Posterior agranular insular area (AIp)  
Posterior amygdalar nucleus (PA)  
Posterior auditory area (AUDpo)  
Posterior hypothalamic nucleus (PH)  
Posterior limiting thalamic nucleus (POL)  
Posterior parietal association areas (PTLp)  
Posterior thalamic complex (PO)  
Posterodorsal preoptic nucleus (PD)  
Posterolateral visual area (VISpl)  
Posteromedial visual area (VISpm)  
Postpiriform transition area (TR)  
Postsubiculum (POST)  
Prelimbic area (PL)  
Preparasubthalamic nucleus (PST)  
Presubiculum (PRE)  
Primary auditory area (AUDp)  
Primary somatomotor area (MOp)  
Primary somatosensory area (SSp)  
Primary visual area (VISp)  
Reticular thalamic nucleus (RT)  
Retina (R)



Retrochiasmatic area (RCH)  
Retrosplenial region dorsal part (RSPd)  
Retrosplenial region lateral agranular part (RSPagl)  
Retrosplenial region ventral part anterior zone (RSPv)  
Retrosplenial region ventral part zone a (RSPv.a)  
Retrosplenial region ventral part zone b/c (RSPv.b/c)  
Rhomboid nucleus (RH)  
Rostrolateral visual area (VISrl)  
Secondary somatomotor areas (MOs)  
Septofimbrial nucleus (SF)  
Septohippocampal nucleus (SH)  
Striatal fundus (FS)  
Subfornical organ (SFO)  
Subiculum dorsal part (SUBd)  
Subiculum ventral part (SUBv)  
Submedial thalamic nucleus (SMT)  
Subparafascicular nucleus magnocellular part (SPFm)  
Subparafascicular nucleus parvicellular part (SPFp)  
Subparaventricular zone (SBPV)  
Subthalamic nucleus (STN)  
Supplemental somatosensory area (SSs)  
Suprachiasmatic nucleus (SCH)  
Suprachiasmatic preoptic nucleus (PSCH)  
Suprageniculate nucleus (SGN)  
Supramammillary nucleus lateral part (SUMl)  
Supramammillary nucleus medial part (SUMm)  
Supraoptic nucleus (SO)  
Temporal association areas (TEa)  
Tenia tecta dorsal part (TTd)  
Tenia tecta ventral part (TTv)  
Triangular septal nucleus (TRS)  
Tuberomammillary nucleus (TM)  
Vascular organ of lamina terminalis (OV)  
Ventral agranular insular area (AIV)  
Ventral anterior-lateral thalamic complex (VAL)  
Ventral auditory areas (AUDv)  
Ventral lateral geniculate nucleus (LGv)  
Ventral medial thalamic nucleus (VM)  
Ventral orbital area (ORBv)  
Ventral posterolateral thalamic nucleus parvicellular part (VPLpc)  
Ventral posterolateral thalamic nucleus principal part (VPLpr)  
Ventral posteromedial thalamic nucleus parvicellular part (VPMpc)  
Ventral posteromedial thalamic nucleus principal part (VPMpr)  
Ventral premammillary nucleus (PMv)  
Ventrolateral orbital area (ORBvl)  
Ventrolateral preoptic nucleus (VLP)  
Ventromedial hypothalamic nucleus anterior part (VMHa)  
Ventromedial hypothalamic nucleus central part (VMHc)  
Ventromedial hypothalamic nucleus dorsomedial part (VMHdm)  
Ventromedial hypothalamic nucleus ventrolateral part (VMHvl)  
Visceral area (VISC)  
Zona incerta (ZI)
