# Supplementary material
Source: PubMed Central journal article supplement (PMC7733829)

# Forebrain regional subsystem analysis: adult female rat

(466 regions; 216,690 possible connections: 35,738 exist; MRCC analysis: 464 regions)

**Connection matrix (raw)**  
(ordinal scale)

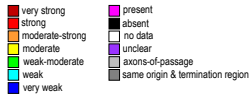

Termination (to forebrain region)

SS1

Functional hierarchy

SS2

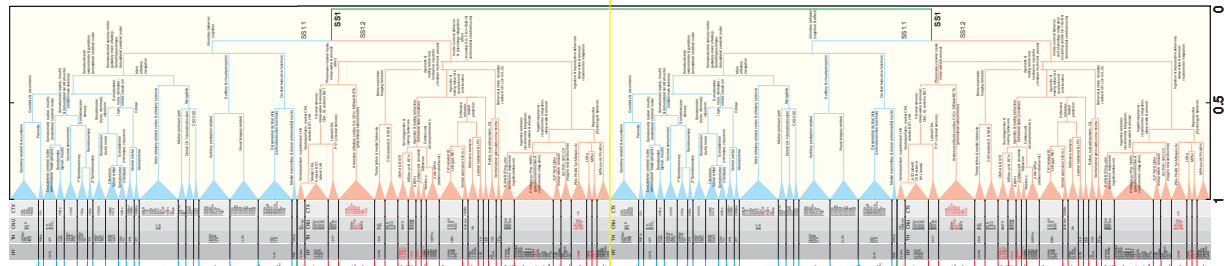

Origin (from forebrain region)

SS1

Functional hierarchy

SS2

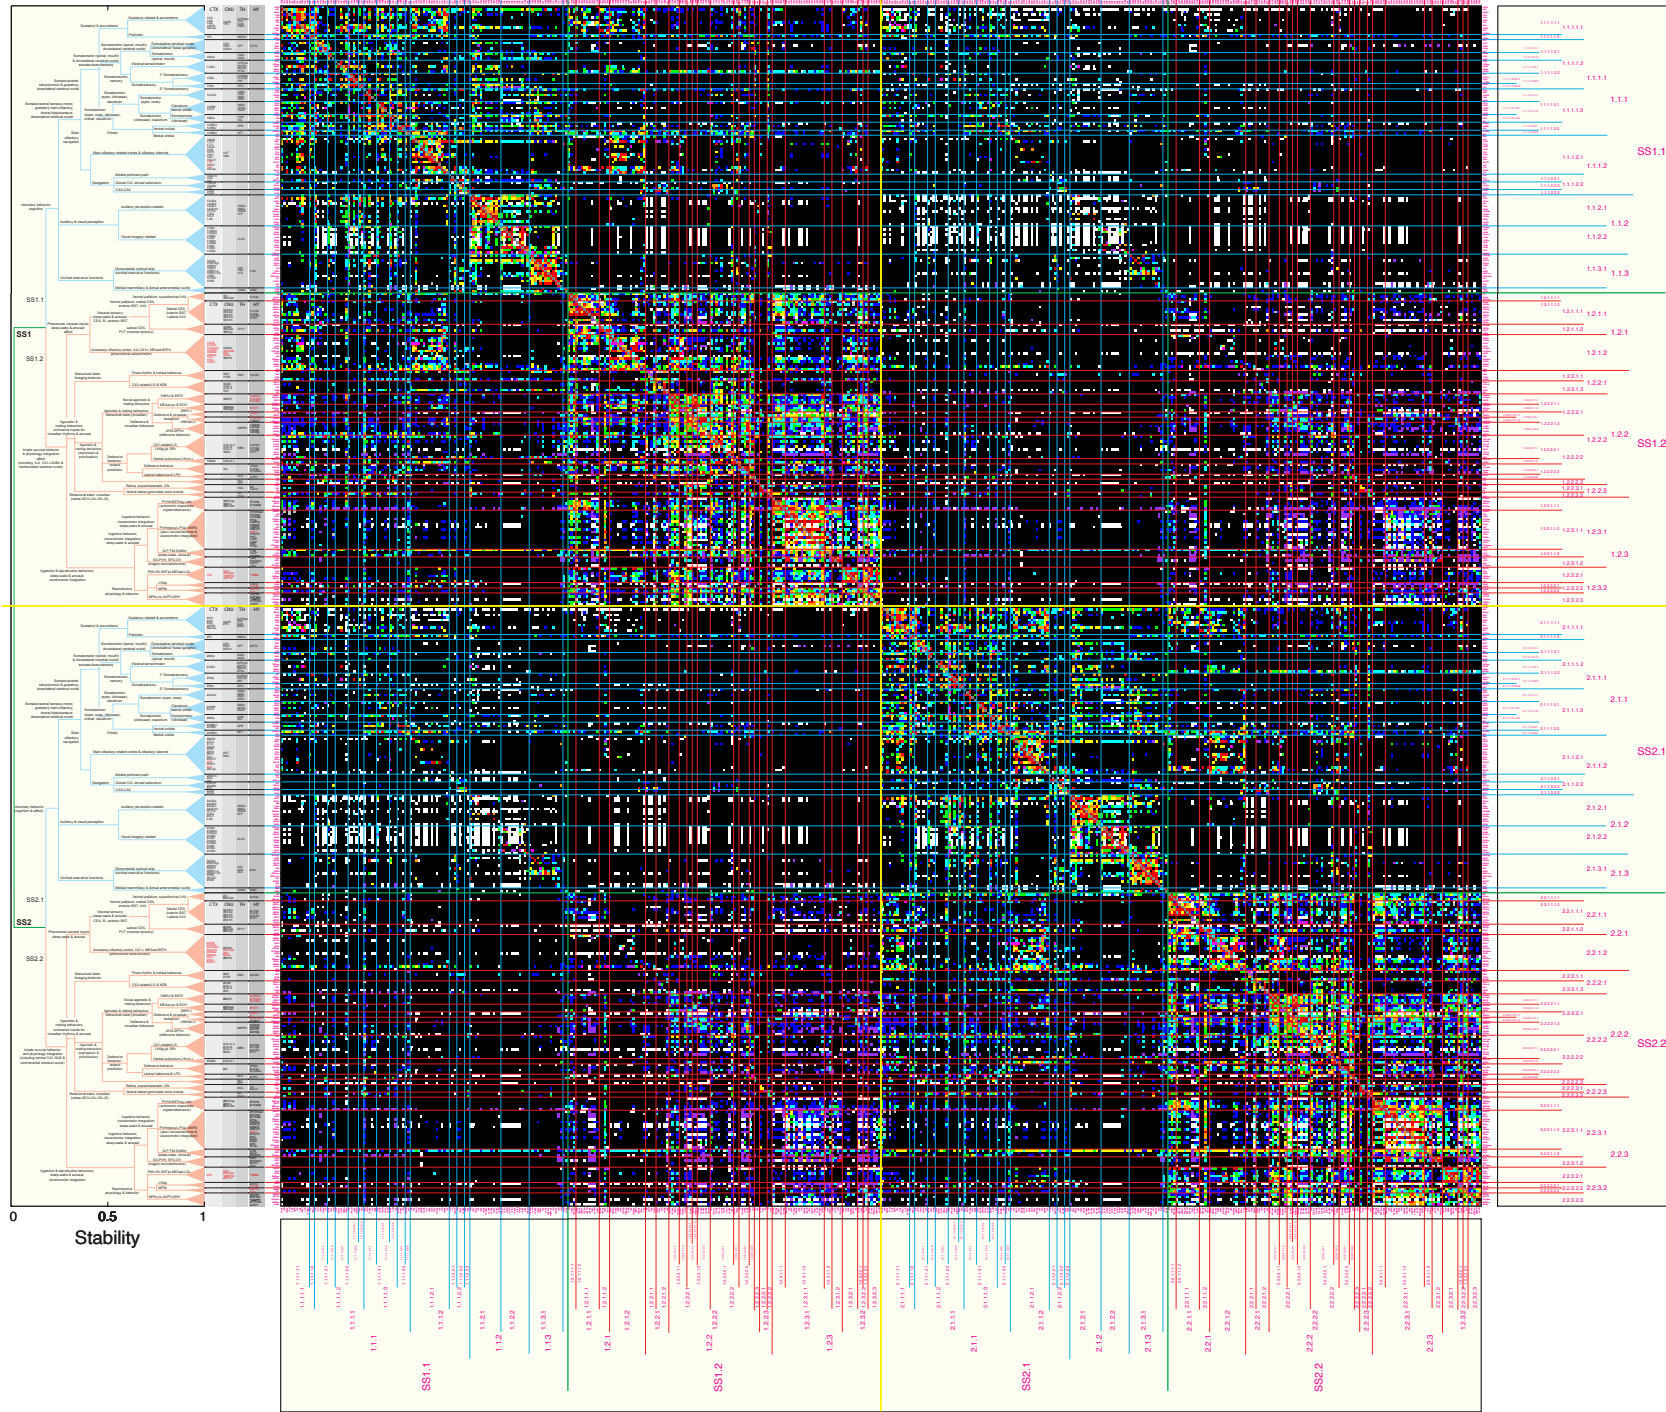

Supplement: pnas.2017733117.sd04.pdf [file pnas.2017733117.sd04.pdf]
